# Supplementary material for: Molecular Doping of CVD-Graphene Surfaces by Perfluoroalkyl-Substituted Perylene Diimides Derivatives
Source: MDPI journal article supplement (doi:10.3390/nano12234239), 2022-11-28
Supplement: s1 [file s1]

# Molecular Doping of CVD-Graphene Surfaces by Perfluoroalkyl-Substituted Perylene Diimides Derivatives

Federico Chianese <sup>1,2,\*</sup>, Lucrezia Aversa <sup>3</sup>, Roberto Verucchi <sup>3,\*</sup> and Antonio Cassinese <sup>1,2</sup>

<sup>1</sup> Dipartimento di Fisica, Università Degli Studi di Napoli Federico II, Piazzale Tecchio 80, 80125 Napoli, Italy

<sup>2</sup> CNR-SPIN, Unità di Napoli, Piazzale Tecchio 80, 80125 Napoli, Italy

<sup>3</sup> Institute of Materials for Electronics and Magnetism, CNR-IMEM, FBK Trento Unit, Via alla Cascata 56/C, 38123 Trento, Italy

\* Correspondence: federico.chianese@unina.it (F.C.); roberto.verucchi@imem.cnr.it (R.V.)

## Supplementary Materials

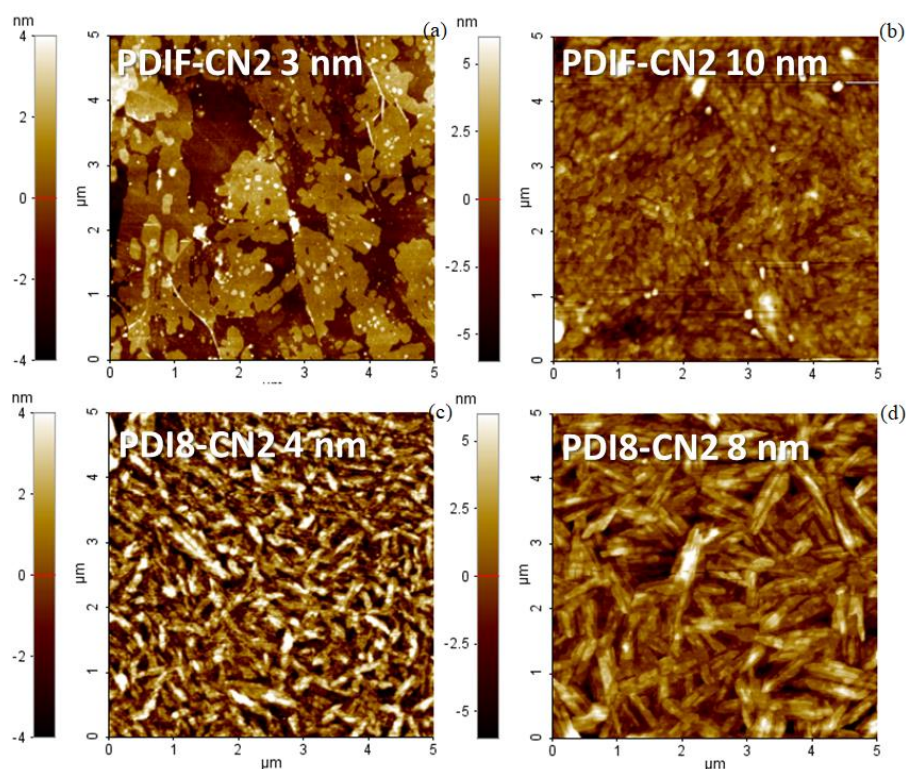

**Figure S1.** NC-AFM topography of PDI8-CN2(c–d) and PDIF-CN2 (a–b) grown on CVD-Graphene for different nominal thin film thicknesses.

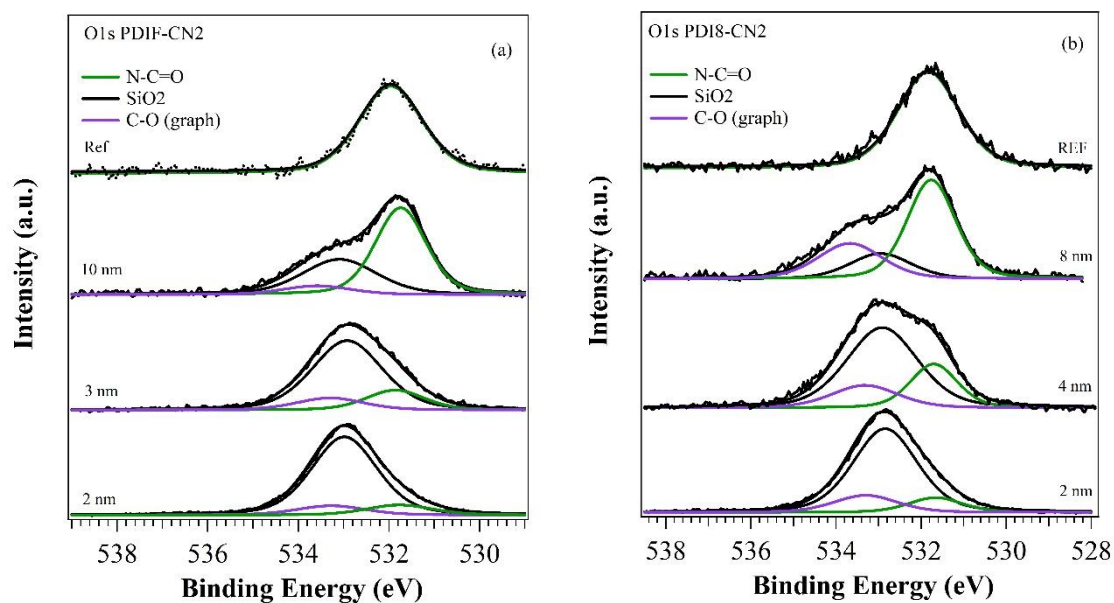

**Figure S2.** XPS O1s core levels spectra for (a) PDIF-CN2 and (b) PDI8-CN2 thin films grown on CVD-Graphene substrates.

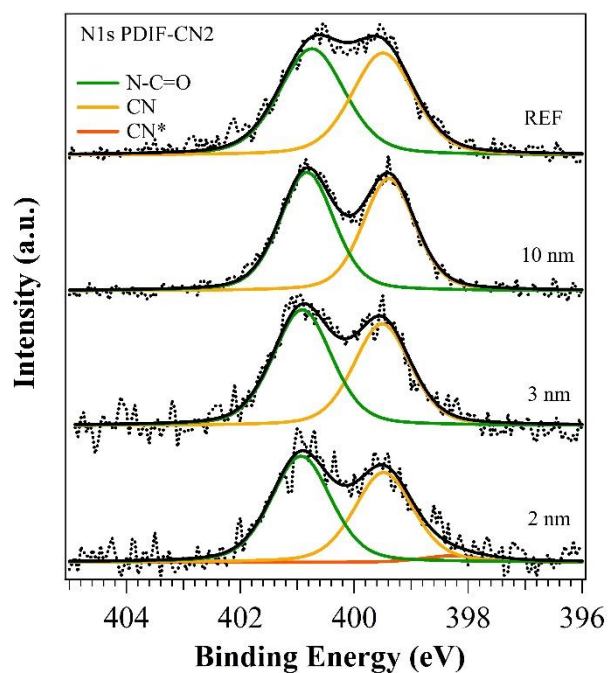

**Figure S3.** XPS N1s core level spectra for PDIF-CN2 thin film grown on CVD-Graphene substrates.

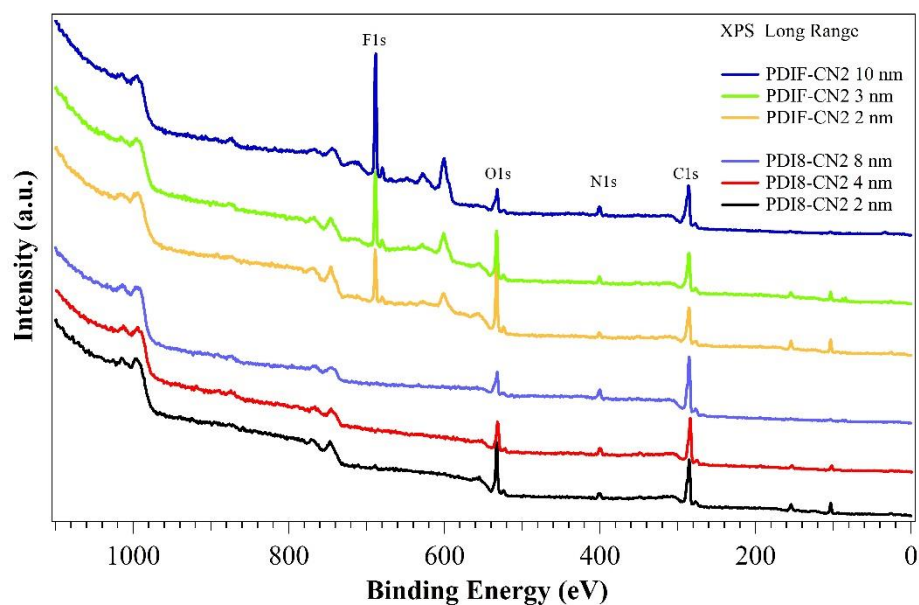

**Figure S4.** Long Range XPS spectra of PDI8-CN2 and PDIF-CN2 films grown on graphene substrate and at various thicknesses.

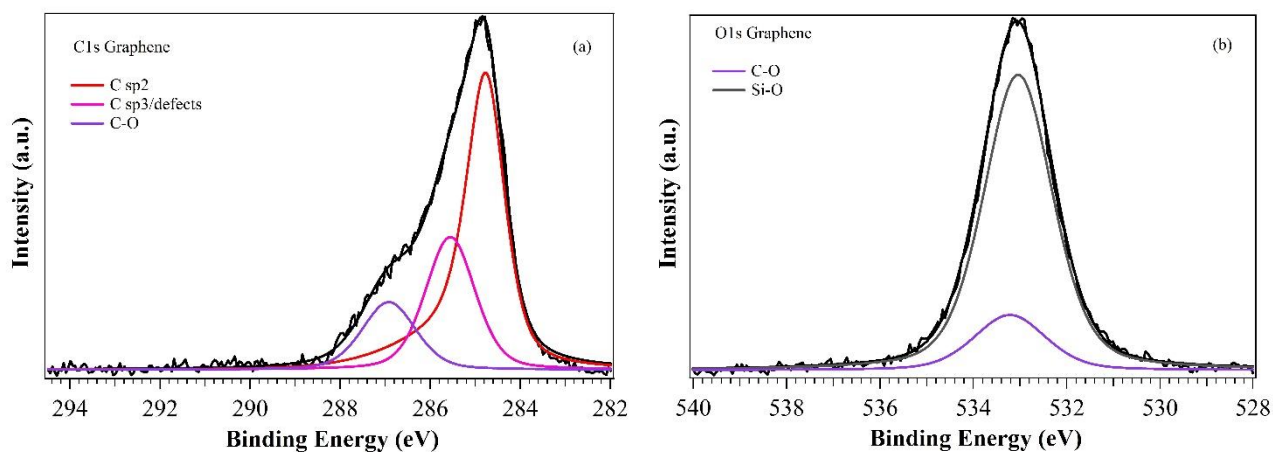

**Figure S5.** (a) C1s and (b) O1s core level spectra of the graphene substrate.

| PDIF-CN2               | 2nm     |           | 3nm     |           | 10nm    |           |
|------------------------|---------|-----------|---------|-----------|---------|-----------|
| C1s                    | BE [eV] | FWHM [eV] | BE [ev] | FWHM [eV] | BE [eV] | FWHM [eV] |
| C-C                    | 285.61  | 1.55      | 285.69  | 1.60      | 285.47  | 1.60      |
| CON                    | 288.75  | 1.50      | 288.69  | 1.55      | 288.56  | 1.50      |
| CN                     | 286.56  | 1.50      | 286.64  | 1.50      | 286.42  | 1.50      |
| CF2                    | 290.86  | 1.38      | 291.01  | 1.40      | 290.80  | 1.41      |
| CF3                    | 293.42  | 1.20      | 293.5   | 1.22      | 293.26  | 1.00      |
| Graph C=C              | 284.70  | 1.00      | 284.65  | 1.01      | 284.78  | 1.06      |
| Graph. sp <sup>3</sup> | 285.50  | 1.22      | 285.43  | 1.15      | 285.60  | 1.16      |
| Graph. Ox.             | 286.85  | 1.48      | 286.80  | 1.47      | 286.93  | 1.40      |
| O1s                    |         |           |         |           |         |           |
| SiO <sub>2</sub>       | 532.98  | 1.70      | 532.91  | 1.88      | 533.25  | 1.97      |
| O in mol               | 531.76  | 1.71      | 531.91  | 1.55      | 531.74  | 1.32      |
| Graph O                | 533.27  | 1.78      | 533.2   | 1.75      | 533.35  | 1.75      |
| N1s                    |         |           |         |           |         |           |
| CN*                    | 398.28  | 1.22      | -       |           | -       |           |
| CN                     | 399.48  | 1.22      | 399.51  | 1.19      | 399.39  | 1.1       |
| N-CO                   | 400.93  | 1.24      | 400.91  | 1.22      | 400.83  | 1.16      |
| F1s                    |         |           |         |           |         |           |
| CF <sub>3</sub>        | 688.36  | 1.65      | 688.28  | 1.53      | 688.14  | 1.53      |
| CF <sub>2</sub>        | 689.06  | 1.85      | 689.09  | 1.67      | 688.89  | 1.70      |

Table S1. Details of core levels deconvolution (BE position and FWHM) for PDIF-CN2 films with thicknesses of 2 nm, 3 nm and 10 nm.

| <b>PDI8-CN2</b>  |         | <b>2nm</b> |         | <b>4nm</b> |         | <b>8nm</b> |
|------------------|---------|------------|---------|------------|---------|------------|
| <b>C1s</b>       | BE [eV] | FWHM [eV]  | BE [eV] | FWHM [eV]  | BE [eV] | FWHM [eV]  |
| C=C arom         | 284.36  | 1.00       | 284.42  | 1.00       | 284.34  | 1.00       |
| C-C chain        | 285.74  | 1.30       | 285.80  | 1.25       | 285.60  | 1.30       |
| C-H ring         | 284.82  | 1.00       | 284.88  | 1.05       | 284.75  | 1.10       |
| CON              | 288.51  | 1.35       | 288.57  | 1.45       | 288.53  | 1.35       |
| CN               | 286.76  | 1.25       | 286.82  | 1.30       | 286.78  | 1.25       |
| Other C          | 286.31  | 1.20       | 286.37  | 1.35       | 286.33  | 1.25       |
| Graph C=C        | 284.79  | 1.10       | 284.72  | 1.05       | 284.92  | 1.10       |
| Graph. sp3       | 285.57  | 1.23       | 285.46  | 1.16       | 285.7   | 1.23       |
| Graph ox.        | 286.94  | 1.45       | 286.87  | 1.45       | 287.07  | 1.40       |
| <b>O1s</b>       |         |            |         |            |         |            |
| SiO <sub>2</sub> | 532.84  | 1.78       | 533.11  | 2.20       | 533.34  | 2.06       |
| O in mol         | 531.66  | 1.50       | 531.8   | 1.30       | 531.76  | 1.41       |
| Graph O          | 533.30  | 1.75       | 533.10  | 2.00       | 533.47  | 1.83       |
| <b>N1s</b>       |         |            |         |            |         |            |
| CN*              | 398.25  | 1.20       | -       | -          | -       | -          |
| CN               | 399.43  | 1.15       | 399.34  | 1.17       | 399.42  | 1.21       |
| N-CO             | 400.70  | 1.14       | 400.64  | 1.15       | 400.69  | 1.20       |

Table S2. Details of core levels deconvolution (BE position and FWHM) for PDI8-CN2 films with thicknesses of 2 nm, 4 nm and 10 nm
